# Supplementary material for: A Proof-of-Concept Preclinical Study Using a Novel Thermal Insulation Device in a Porcine Kidney Auto-Transplantation Model
Source: MDPI journal article supplement (doi:10.3390/ijms232213806), 2022-11-09
Supplement: s1 [file s1]

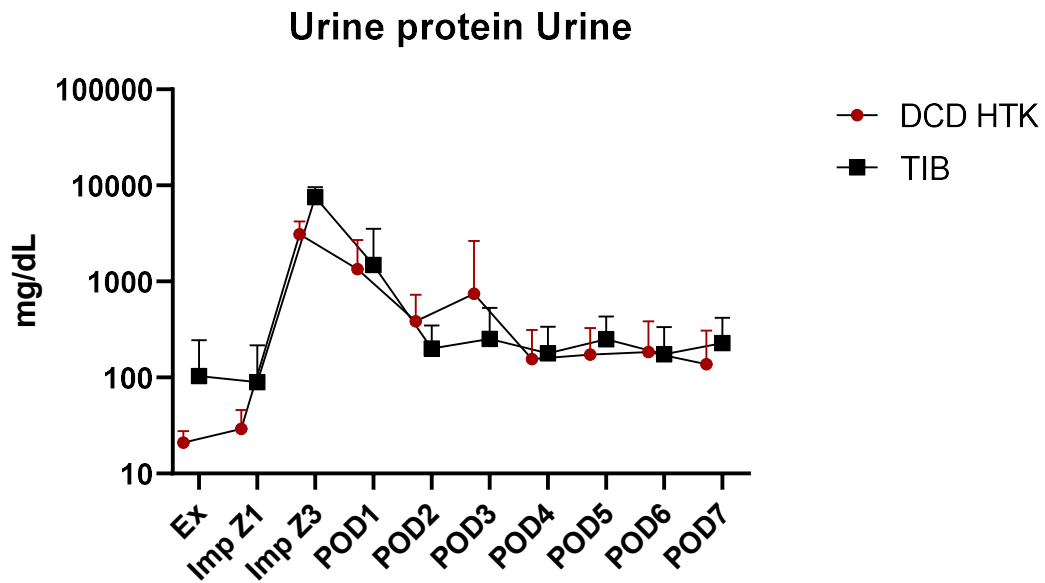

**Figure S1.** Protein values of Urine in mg/dl over 7 days after surgery. No significant differences can be shown between the group DCD HTK and TIB.

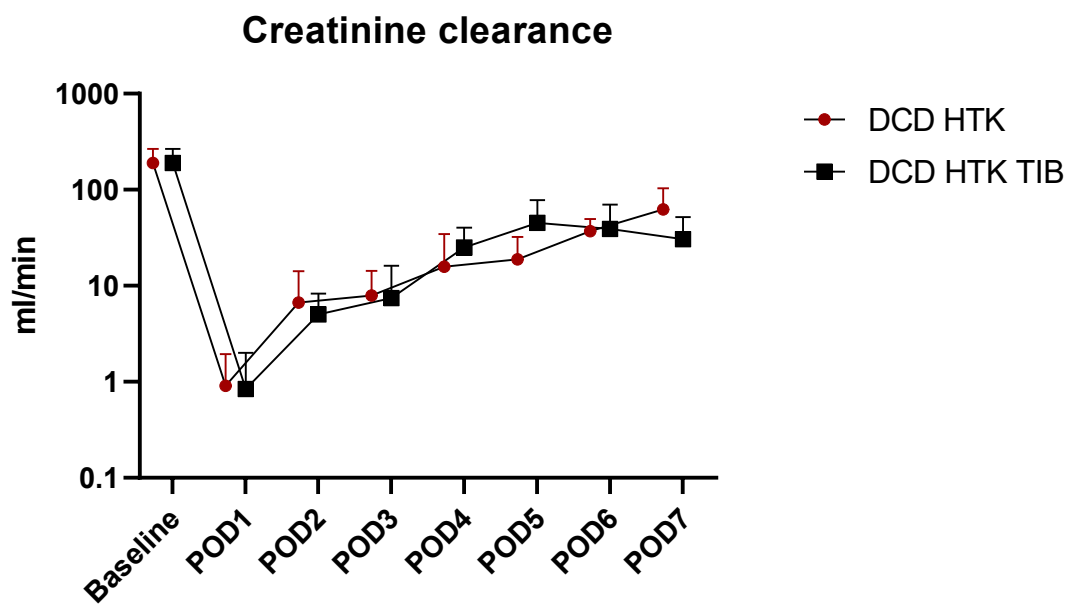

**Figure S2.** Creatinine clearance over 7 days after surgery. No significant differences can be shown between the group DCD HTK and TIB.

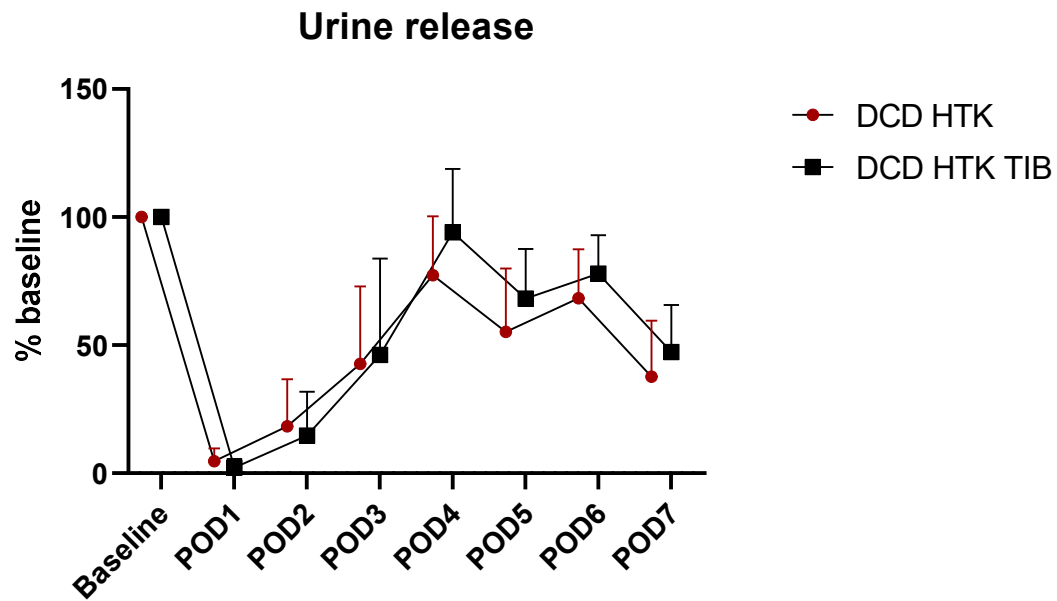

**Figure S3.** Urine release normalized to individual Baseline over 7 days after surgery. No significant differences can be shown between the group DCD HTK and TIB.

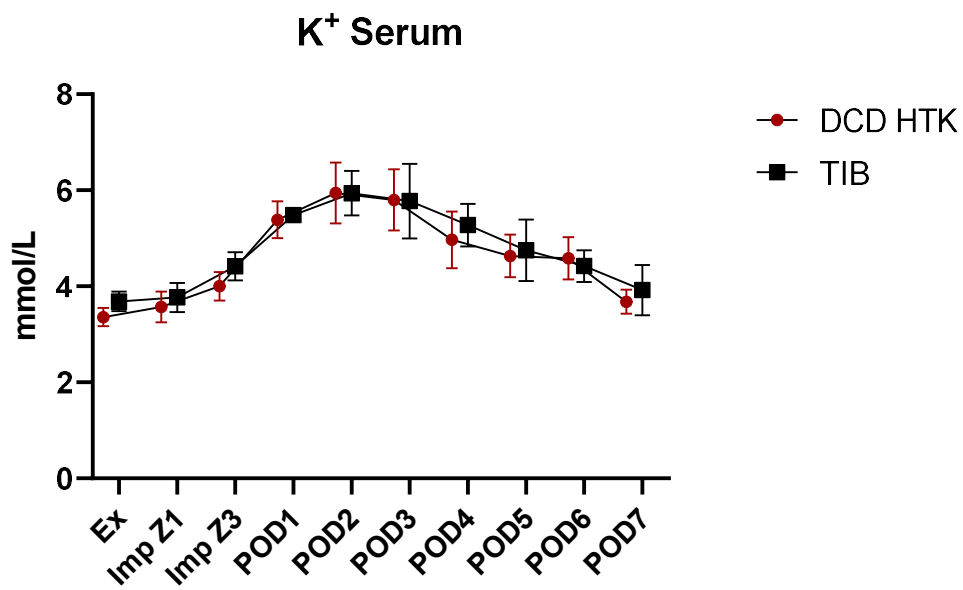

**Figure S4.** Potassium serum level over 7 days after surgery. No significant differences can be shown between the group DCD HTK and TIB.
